# Supplementary material
Source: publisher figshare collection journal article supplement (https://acs.figshare.com/ndownloader/files/5823984)
Supplement: Supplementary file 1 [file 5823984]

# Macromolecules

Macromolecules, 1996, 29(3), 1082-1084, DOI:[10.1021/ma951414t](https://doi.org/10.1021/ma951414t)

## Terms & Conditions

Electronic Supporting Information files are available without a subscription to ACS Web Editions. The American Chemical Society holds a copyright ownership interest in any copyrightable Supporting Information. Files available from the ACS website may be downloaded for personal use only. Users are not otherwise permitted to reproduce, republish, redistribute, or sell any Supporting Information from the ACS website, either in whole or in part, in either machine-readable form or any other form without permission from the American Chemical Society. For permission to reproduce, republish and redistribute this material, requesters must process their own requests via the RightsLink permission system. Information about how to use the RightsLink permission system can be found at <http://pubs.acs.org/page/copyright/permissions.html>

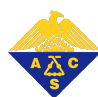

ACS Publications

MOST TRUSTED. MOST CITED. MOST READ.

Copyright © 1996 American Chemical Society

**Synthesis and Characterization of R-4, R-5, 6, R-7 and rac-7.**

**(R)-6,6'-Dibromo-2,2'-dihexyloxy-1,1'-binaphthyl, R-4:** To a solution of (R)-6,6'-dibromo-1,1'-bi-2-naphthol, R-3 (4.88 g, 11 mmol), in acetone (70 mL) was added 1-iodohexane (12.0 g, 56.5 mmol) and  $K_2CO_3$  (7.0 g, 50.7 mmol). The mixture was heated to reflux and the reaction was monitored by  $^1H$  NMR and TLC. After 24 h, the solvent was evaporated, and water (30 mL) was added to the mixture, which was then extracted with ethyl acetate (3 x 50 mL). The combined organic layers were washed with  $Na_2SO_3$  solution and brine, and then dried over  $Na_2SO_4$ . After evaporation of the solvent, excess 1-iodohexane was recovered by distillation under reduced pressure, and an oily residue was obtained. Flash chromatography of the oil on silica gel by using EtOAc/hexanes as the eluent gave pure R-4 (6.40 g, 95%). The oil solidifies after standing at rt. mp 56.5 - 58.0 °C.  $[\alpha]_D = 25.9^\circ$  (c = 0.52, THF). FT-IR (KBr)  $cm^{-1}$  1616 (w), 1581 (s), 1492 (s), 1468 (s), 1338 (s), 1263 (s), 1238 (s), 1076 (s), 1022 (m), 939 (m), 895 (m), 871 (m), 815 (m), 790 (m). UV-vis  $\lambda_{max}$  ( $CH_2Cl_2$ ) nm 350, 284, 256.  $^1H$  NMR (270 MHz,  $CDCl_3$ )  $\delta$  0.74 (t,  $J$  = 6.6 Hz, 6 H,  $-CH_3$ ), 1.01 (m, 8 H,  $-CH_2CH_2CH_3$ ), 1.38 (m, 4 H,  $-OCH_2CH_2-$ ), 3.90 (m, 4 H,  $-OCH_2-$ ), 6.98 (d,  $J$  = 8.8 Hz, 2 H), 7.25 (dd,  $J$  = 8.8, 2.2 Hz, 2 H), 7.39 (d,  $J$  = 8.8 Hz, 2 H), 7.82 (d,  $J$  = 8.8 Hz, 2 H), 7.99 (d,  $J$  = 2.2 Hz, 2 H).  $^{13}C\{^1H\}$  NMR (67.5 MHz,  $CDCl_3$ )  $\delta$  13.90, 22.46, 25.29, 29.25, 31.26, 69.52, 116.40, 117.22, 120.05, 127.10, 128.37, 129.43, 129.74, 130.19, 132.57, 154.77. MS  $m/z$  612 ( $M^+$ ), 528, 364. Anal. Calcd for  $C_{32}H_{36}O_2Br_2$ : C, 62.76; H, 5.8. Found: C, 62.91; H, 5.60.

**(R)-2,2'-Dihexyloxy-1,1'-binaphthyl-6,6'-diboronic acid, R-5:** To a mixture of Mg (288 mg, 12 mmol) in THF (5 mL) was slowly added a THF solution (15 mL) of R-4 (3.06 g, 5 mmol) and  $ClCH_2CH_2Cl$  (0.198 g, 2 mmol) over 30 min at 60 °C under  $N_2$ . The mixture was then gently refluxed for 6 h to give a homogeneous solution of the bifunctional Grignard reagent. This solution was then slowly added to a solution of  $B(OMe)_3$  (2.74 g, 26.4 mmol) in  $Et_2O$  (30 mL) at -78 °C. The reaction mixture was warmed to room temperature and stirred for 48 h. 1N HCl (50 mL) was added at 0 °C and the resulting solution was extracted with EtOAc (3 x 50 mL).

The combined organic layers were washed with brine, and dried over Na<sub>2</sub>SO<sub>4</sub>. After filtration and evaporation of the solvent, the product was purified by flash chromatography on silica gel (EtOAc/hexanes) to give **R-5** (1.36 g) in 50.2% yield. mp 287-290 °C.  $[\alpha]_D = 35.6^\circ$  (c = 0.22, DMSO). FT-IR (KBr) cm<sup>-1</sup> 3441 (s), 1620 (s), 1467 (s), 1398 (s), 1377 (s), 1315 (s), 1244 (s), 1078 (w), 1047 (m), 908 (w), 831 (w). UV-vis  $\lambda_{\max}$  (MeOH) nm 346, 266, 234. <sup>1</sup>H NMR (400 MHz, DMSO-*d*<sub>6</sub>)  $\delta$  0.65 (t, *J* = 6.8 Hz, 6 H, -CH<sub>3</sub>), 0.92 [m, 12 H, -(CH<sub>2</sub>)<sub>3</sub>CH<sub>3</sub>], 1.31 (m, 4 H, OCH<sub>2</sub>CH<sub>2</sub>-), 3.92 (m, 4 H, -OCH<sub>2</sub>-), 6.84 (d, *J* = 8.6 Hz, 2 H), 7.50 (d, *J* = 9.1 Hz, 2 H), 7.53 (d, *J* = 8.6 Hz, 2 H), 7.99 (d, *J* = 9.1 Hz, 2 H), 8.08 [s, 4 H, -B(OH)<sub>2</sub>], 8.36 (s, 2 H). <sup>13</sup>C{<sup>1</sup>H} NMR (100 MHz, DMSO-*d*<sub>6</sub>)  $\delta$  13.94, 22.10, 24.96, 28.96, 30.90, 68.66, 115.29, 119.30, 123.53, 128.30, 128.70, 129.99, 130.88, 134.78, 135.52, 154.84. HRMS (Electron Spray) *m/e* calcd for C<sub>32</sub>H<sub>40</sub>O<sub>6</sub>B<sub>2</sub> + H<sup>+</sup>: 543.3089, obsd: 543.3083.

**Rac-4** and **rac-5** were prepared similarly.

**1,4-Bis(*p*-bromostyryl)benzene, 6:** To a solution of *p*-bromobenzaldehyde (1.85 g, 10 mmol) and *p*-xylylene-bis-(triphenylphosphonium) chloride (3.50 g, 5 mmol) in EtOH, a solution of lithium (0.1 g, 14 mmol) in EtOH (15 mL) was added over 1 h during which the product precipitated out as a yellow solid. The reaction mixture was stirred at rt for additional 2 h. Filtration and recrystallization from EtOAc gave **6** as light yellow crystals (1.40 g, 64%). mp 174.0 - 179.0 °C. FT-IR (KBr) cm<sup>-1</sup> 1631 (w), 1581 (m), 1508 (m), 1485 (s), 1421 (m), 1400 (m), 1068 (s), 1010 (s), 970 (s), 947 (w), 885 (s), 835 (s), 810 (s), 758 (m), 733 (m), 565 (s), 515 (s). UV-vis  $\lambda_{\max}$  (CH<sub>2</sub>Cl<sub>2</sub>) nm 342, 288, 242. <sup>1</sup>H NMR (270 MHz, acetone-*d*<sub>6</sub>, cis-trans isomers)  $\delta$  6.56 (m, 2.16 H, CH=CH), 7.02-7.48 (m, 12 Ar-H + 1.84 CH=CH). <sup>13</sup>C{<sup>1</sup>H} NMR (67.5 MHz, CDCl<sub>3</sub>, cis-trans isomers)  $\delta$  121.37, 126.47, 127.47, 127.95, 128.87, 129.14, 129.24, 130.51, 131.36, 136.01, 136.19, 136.40. MS *m/z* 440 (M<sup>+</sup>), 360, 279, 202, 139, 77. Anal. Calcd for C<sub>22</sub>H<sub>16</sub>Br<sub>2</sub>: C, 60.02; H, 3.63. Found: C, 60.28; H, 3.79.

**Polymer R-7:** To a mixture of **R-5** (544 mg, 1 mmol) and **6** (440 mg, 1 mmol) in THF (10 mL) and K<sub>2</sub>CO<sub>3</sub> (15 mL, 1 M), a solution of Pd(PPh<sub>3</sub>)<sub>4</sub> (58 mg, 0.050 mmol) in THF (5 mL) was

added. The reaction mixture was refluxed for 48 h. The organic layer was diluted with  $\text{CH}_2\text{Cl}_2$  (100 mL) and washed with 1N HCl (30 mL) and brine. After removal of the solvent, a solid was obtained, which was dissolved in THF and precipitated twice with MeOH. The solid, R-7, was isolated by centrifugation and removal of the solution with pipette, and was dried under vacuum at room temperature for 24 h. The yield of R-7 was 95% (695 mg).  $[\alpha]_D = -351^\circ$  ( $c = 0.38$ , THF). GPC (THF, polystyrene standard):  $M_n = 20,000$ ,  $M_w = 67,000$ , PDI = 3.4. DSC:  $T_g = 211.4^\circ\text{C}$ . TGA:  $T_{\text{onset}} = 339.6^\circ\text{C}$ . UV-vis  $\lambda_{\text{max}}$  ( $\text{CH}_2\text{Cl}_2$ ) nm 390, 268. FT-IR (KBr)  $\text{cm}^{-1}$  1622 (w), 1593 (s), 1518 (w), 1493 (s), 1462 (s), 1402 (w), 1343 (s), 1275 (s), 1244 (s), 1094 (m), 1055 (s), 1018 (w), 961 (w), 945 (w), 817 (s).  $^1\text{H}$  NMR (400 MHz,  $\text{CDCl}_3$ , broad peaks)  $\delta$  0.70 ( $\text{CH}_3$ ), 1.00 [ $-(\text{CH}_2)_2\text{CH}_3$ ], 1.42 ( $-\text{CH}_2\text{CH}_2\text{O}-$ ), 3.96 ( $-\text{OCH}_2-$ ), 6.61 ( $-\text{CH}=\text{CH}-$ ), 7.11-7.69 (Ar-H,  $-\text{CH}=\text{CH}-$ ), 8.00-8.11 (Ar-H).  $^{13}\text{C}\{^1\text{H}\}$  NMR (100 MHz,  $\text{CDCl}_3$ )  $\delta$  13.88, 22.43, 25.31, 29.32, 31.28, 69.65, 116.11, 120.37, 125.45, 126.06, 126.34, 126.83, 126.90, 127.29, 128.13, 129.28, 129.33, 129.40, 133.44, 135.40, 135.94, 135.99, 136.19, 136.65, 139.86, 140.35, 154.74. Anal. Calcd for  $\text{C}_{54}\text{H}_{52}\text{O}_2$ : C, 88.53; H 7.10. Found: C, 87.79; H, 7.30.

**Polymer rac-7:** Rac-7 was prepared similarly to R-7 in 96% yield. GPC (THF, polystyrene standard):  $M_n = 17,000$ ,  $M_w = 48,000$ , PDI = 2.8. DSC:  $T_g = 203.4^\circ\text{C}$ . TGA:  $T_{\text{onset}} = 391.4^\circ\text{C}$ . UV-vis  $\lambda_{\text{max}}$  ( $\text{CH}_2\text{Cl}_2$ ) nm 392, 268. FT-IR (KBr)  $\text{cm}^{-1}$  1622 (w), 1593 (s), 1518 (m), 1493 (s), 1462 (s), 1402 (m), 1343 (s), 1275 (s), 1244 (s), 1094 (m), 1055 (m), 1018 (m), 961 (m), 945 (w), 817 (s).  $^1\text{H}$  NMR (400 MHz,  $\text{CDCl}_3$ )  $\delta$  0.71 ( $-\text{CH}_3$ ), 1.00 [ $-(\text{CH}_2)_2\text{CH}_3$ ], 1.42 ( $-\text{CH}_2\text{CH}_2\text{O}-$ ), 3.96 ( $-\text{OCH}_2$ ), 6.61 ( $-\text{CH}=\text{CH}-$ ), 7.03-7.71 (Ar-H,  $-\text{CH}=\text{CH}-$ ), 7.97-8.11 (Ar-H).  $^{13}\text{C}\{^1\text{H}\}$  NMR (100 MHz,  $\text{CDCl}_3$ )  $\delta$  13.94, 22.46, 25.34, 29.34, 31.31, 69.68, 116.13, 120.39, 125.47, 126.08, 126.36, 126.85, 126.92, 127.31, 128.15, 129.30, 129.35, 129.42, 133.46, 135.42, 135.96, 136.01, 136.21, 136.67, 139.89, 140.37, 154.76. Anal. Calcd for  $\text{C}_{54}\text{H}_{52}\text{O}_2$ : C, 88.53; H, 7.10. Found: C, 87.54; H, 7.13.
